# Supplementary material for: Expression and Identification of a Novel High-Activity Recombinant Humanized Type I Collagen SynthCol1 in Pichia Pastoris
Source: Research Square preprint supplement (doi:10.21203/rs.3.rs-7985426/v1), 2025-11-21
Supplement: Supplementary file 2 [file 7007d42df656c0b9a02629b6.docx]

**Supplementary Materials**

**Table S1.** Codon optimization of SynthCol1 for Pichia pastoris expression. Shown are the designed DNA sequence and its corresponding amino acid translation.

| [**Amino**](javascript:;)[**acid**](javascript:;)  **sequence**  **(**567aa**)** | GARGERGFPGERGVQGPPGPAGPRGANGAPGNDGAKGDAGAPGAPGSQGAPGLQGMPGERGAAGARGERGFPGERGVQGPPGPAGPRGANGAPGNDGAKGDAGAPGAPGSQGAPGLQGMPGERGAAGARGERGFPGERGVQGPPGPAGPRGANGAPGNDGAKGDAGAPGAPGSQGAPGLQGMPGERGAAGARGERGFPGERGVQGPPGPAGPRGANGAPGNDGAKGDAGAPGAPGSQGAPGLQGMPGERGAAGARGERGFPGERGVQGPPGPAGPRGANGAPGNDGAKGDAGAPGAPGSQGAPGLQGMPGERGAAGARGERGFPGERGVQGPPGPAGPRGANGAPGNDGAKGDAGAPGAPGSQGAPGLQGMPGERGAAGARGERGFPGERGVQGPPGPAGPRGANGAPGNDGAKGDAGAPGAPGSQGAPGLQGMPGERGAAGARGERGFPGERGVQGPPGPAGPRGANGAPGNDGAKGDAGAPGAPGSQGAPGLQGMPGERGAAGARGERGFPGERGVQGPPGPAGPRGANGAPGNDGAKGDAGAPGAPGSQGAPGLQGMPGERGAA |
| --- | --- |
| **DNA sequence**  **(**1704bp**)** | GGCGCCAGAGGTGAAAGGGGGTTCCCTGGAGAGCGTGGGGTGCAGGGCCCCCCTGGTCCAGCCGGCCCTCGCGGGGCTAATGGGGCCCCTGGTAACGACGGAGCAAAAGGTGACGCTGGCGCACCTGGGGCCCCGGGTTCCCAAGGCGCACCTGGTCTGCAGGGGATGCCCGGGGAGCGCGGTGCGGCCGGCGCGCGTGGGGAACGGGGATTTCCCGGGGAGCGAGGTGTGCAGGGACCCCCAGGTCCGGCAGGTCCCCGAGGAGCGAACGGCGCTCCGGGTAATGACGGGGCAAAGGGCGATGCCGGAGCTCCGGGAGCGCCTGGCTCACAAGGCGCTCCGGGCCTACAGGGGATGCCAGGTGAGAGAGGAGCAGCGGGAGCTCGGGGTGAACGGGGTTTTCCCGGGGAACGAGGAGTTCAAGGTCCCCCTGGCCCGGCAGGCCCGCGGGGAGCAAACGGAGCGCCTGGAAATGACGGAGCCAAGGGCGATGCAGGCGCTCCGGGCGCTCCCGGCTCGCAGGGTGCCCCAGGATTACAAGGTATGCCCGGAGAAAGGGGTGCAGCGGGGGCGAGAGGTGAACGCGGATTCCCCGGGGAGCGCGGCGTCCAGGGTCCACCAGGACCCGCCGGGCCCCGAGGAGCAAACGGCGCACCTGGCAACGATGGAGCCAAGGGGGACGCGGGCGCCCCAGGAGCCCCGGGTAGTCAGGGCGCTCCAGGCCTTCAAGGTATGCCTGGAGAACGCGGCGCCGCGGGTGCGCGGGGCGAACGGGGTTTTCCTGGAGAACGTGGCGTCCAAGGCCCCCCAGGTCCTGCGGGTCCTCGAGGTGCGAACGGAGCTCCAGGCAACGACGGGGCAAAAGGGGATGCCGGGGCCCCCGGAGCTCCGGGAAGCCAGGGGGCCCCAGGTCTCCAGGGTATGCCAGGCGAGCGGGGTGCCGCTGGCGCGAGGGGAGAGAGAGGTTTCCCCGGGGAGAGGGGGGTTCAAGGGCCCCCTGGCCCGGCGGGGCCAAGGGGTGCCAATGGTGCACCTGGAAACGATGGCGCTAAAGGGGACGCGGGGGCTCCAGGTGCTCCGGGATCTCAAGGAGCACCAGGTCTACAGGGAATGCCCGGTGAACGTGGGGCCGCGGGAGCGAGAGGAGAGAGGGGCTTTCCTGGGGAACGTGGCGTACAGGGACCACCCGGTCCTGCAGGTCCAAGGGGCGCGAACGGCGCACCCGGTAATGATGGGGCCAAAGGGGATGCTGGTGCTCCGGGCGCTCCTGGATCACAAGGGGCGCCGGGATTGCAAGGGATGCCGGGGGAGCGAGGCGCGGCCGGCGCAAGAGGAGAACGTGGGTTCCCGGGTGAGAGAGGTGTACAGGGGCCGCCAGGCCCGGCCGGGCCAAGGGGGGCCAATGGGGCACCTGGGAATGATGGGGCCAAGGGCGATGCAGGAGCTCCTGGGGCACCCGGCTCTCAAGGCGCCCCGGGTCTGCAAGGGATGCCGGGAGAACGGGGGGCTGCGGGAGCACGCGGGGAACGAGGCTTCCCAGGCGAGCGTGGGGTGCAAGGGCCCCCTGGCCCAGCTGGACCGCGTGGAGCTAATGGAGCGCCGGGTAATGACGGAGCAAAAGGTGACGCTGGAGCGCCAGGTGCACCGGGTTCCCAGGGAGCACCAGGCCTCCAGGGAATGCCCGGGGAGCGCGGGGCTGCTTGA |

**Table S2. Reagents and kits used for immunofluorescence, histological, and biochemical analyses in the 3D full-thickness skin model (T-SkinTM).**

| **Analysis Type** | **Target** | **Reagent/Kit** | **Supplier** | **Catalog/Batch No.** |
| --- | --- | --- | --- | --- |
| 1. **Core Materials** | Skin Model | T-SkinTM  Full-Thickness Model Kit | Episkin | 24TS150205 |
|  | Culture Maintenance | T-SkinTM Maintenance Medium | Episkin | 24-MED-0205 |
| **(b) Immunofluorescence** | Collagen IV | Recombinant Rabbit Anti-Human Collagen IV Antibody | Abcam | ab6586 |
|  | Collagen VII | Recombinant Rabbit Anti-Human Collagen VII Antibody | Affinity | DF8901 |
|  | Collagen XVII | Recombinant Rabbit Anti-Human Collagen XVII Antibody | Abcam | ab184996 |
|  | Loricrin | Recombinant Rabbit Anti-Human Loricrin Antibody | Abcam | ab198994 |
|  | Aquaporin 3 (AQP3) | Recombinant Rabbit Anti-Human AQP3 Antibody | Abcam | ab125219 |
|  | Cytokeratin | Recombinant Rabbit Anti-Human Cytokeratin Antibody | Abcam | ab9377 |
|  | Reactive Oxygen Species (ROS) | ROS Indicator | Sigma-Aldrich | 309800 |
| **(c) Biochemical & Histology** | IL-1α Quantification | Human IL-1α ELISA Kit | Invitrogen | EH0184 |
|  | Histological Analysis | Hematoxylin & Eosin Staining Kit | Abcam | ab245880 |

**Supplementary Figure**

**
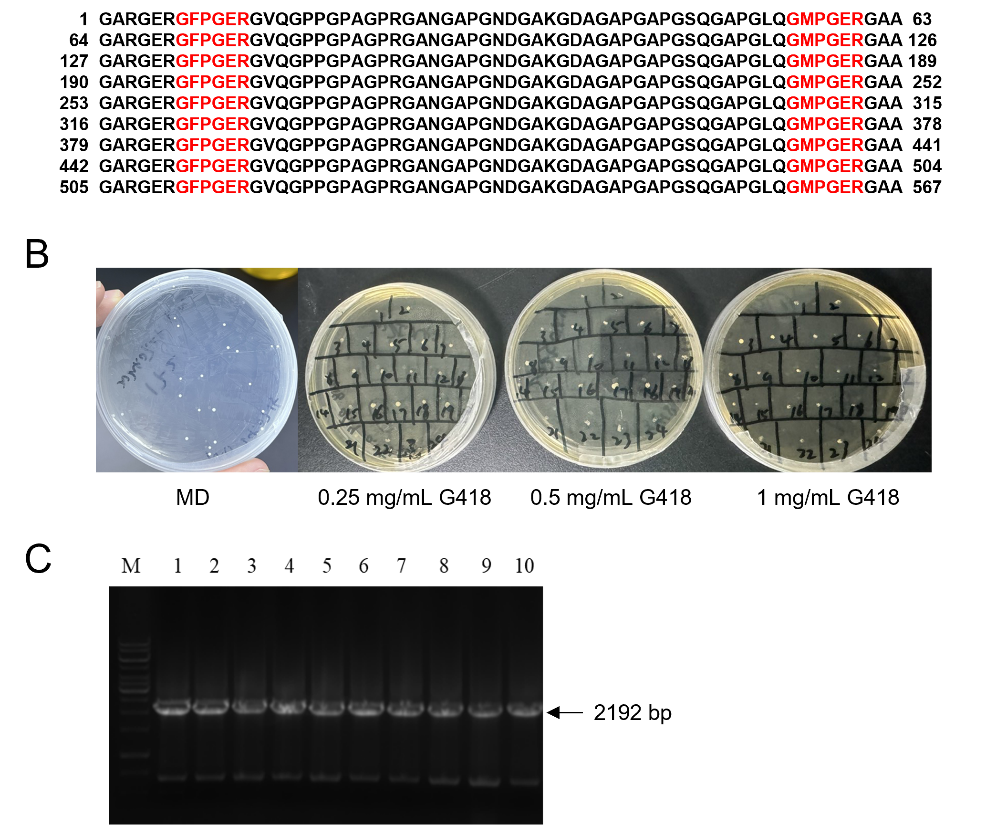
**

Supplementary Figure S1. Construction of the *Pichia pastoris* recombinant strain expressing humanized type I collagen SynthCol1.(A) Amino acid sequence of SynthCol1. Key integrin-binding sites (GFPGER and GMPGER) are designated in red. (B) Screening of *P. pastoris* transformants on MD plates and YPD plates with increasing concentrations of G418. (C) Agarose gel electrophoresis analysis for PCR confirmation of the SynthCol1 gene integration into the *P. pastoris* genome. The expected band size is indicated by the arrow.

**
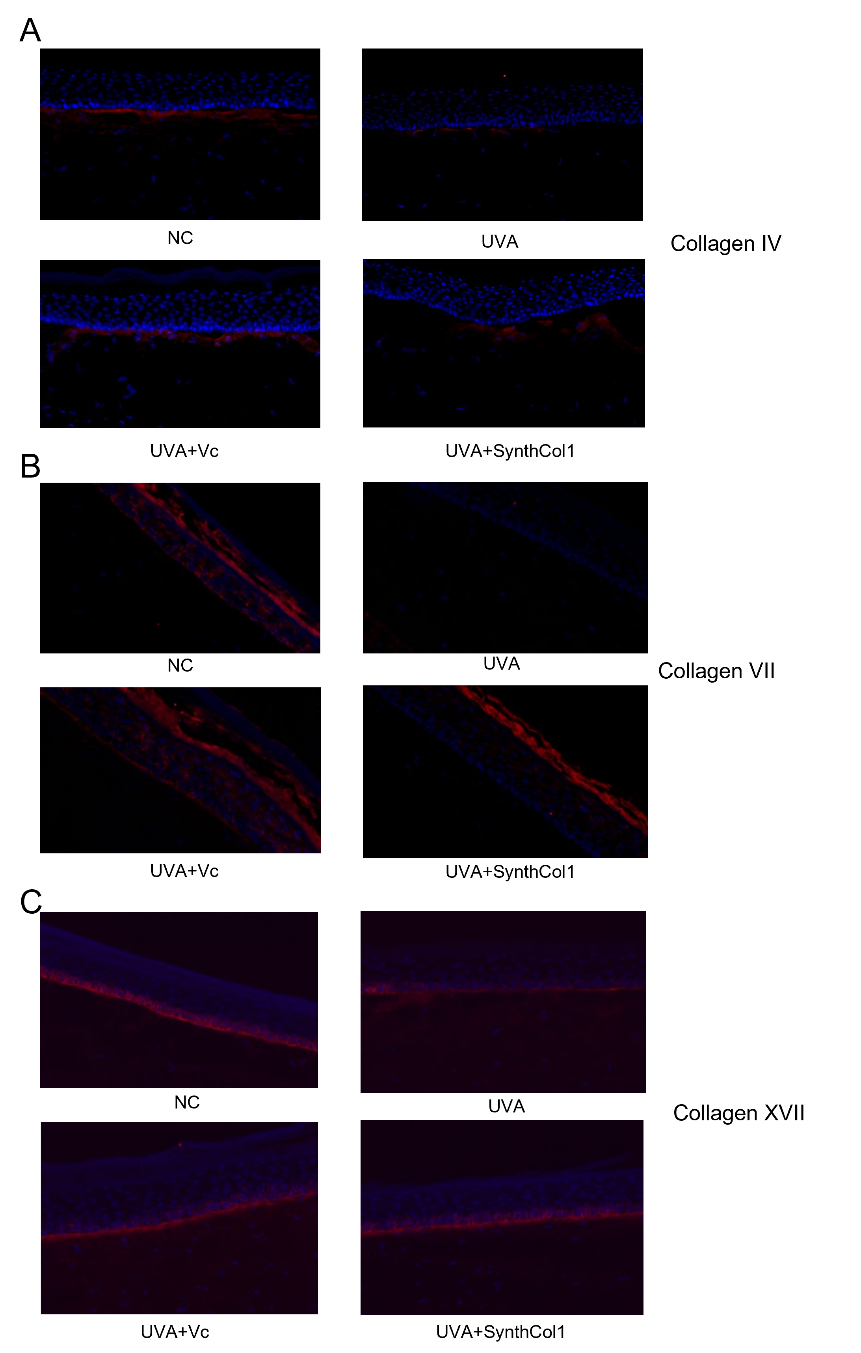

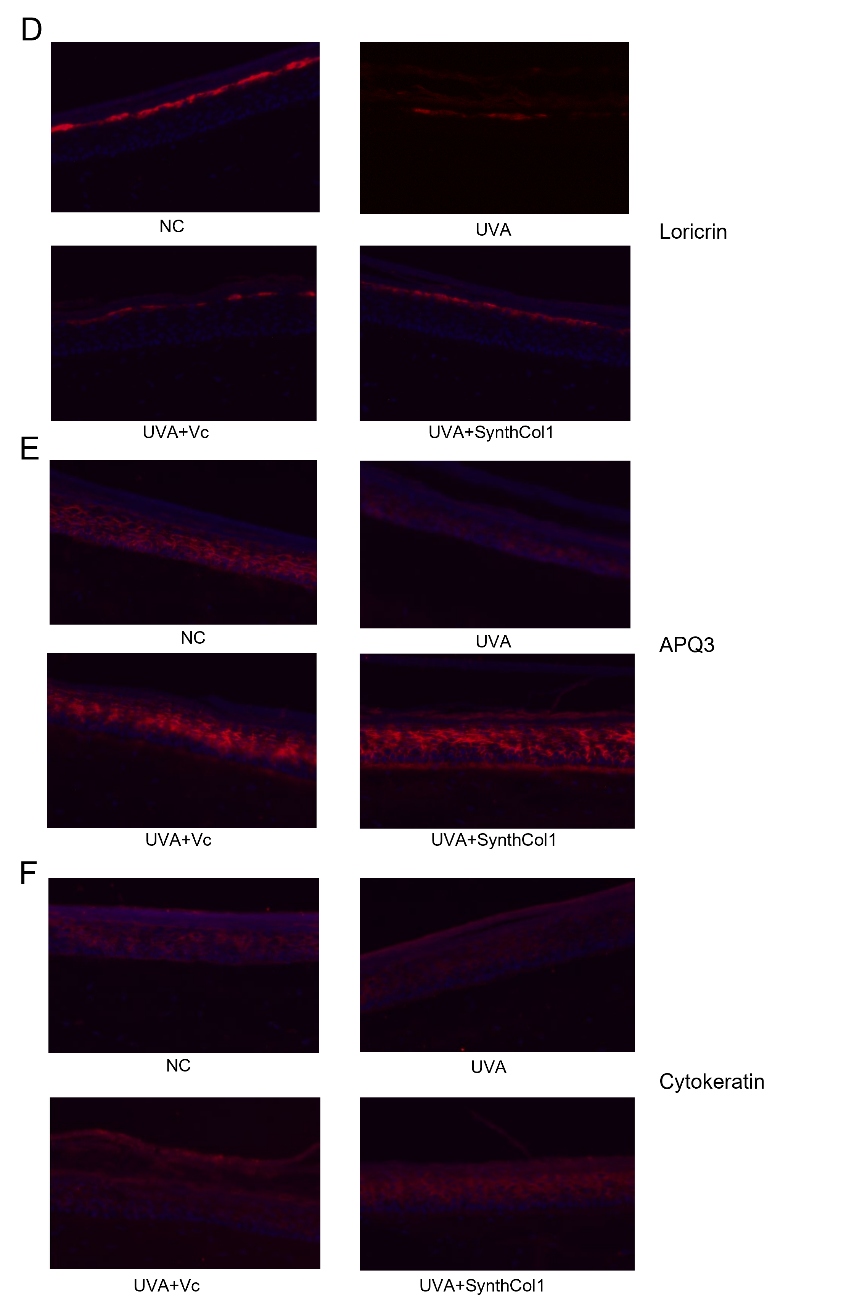

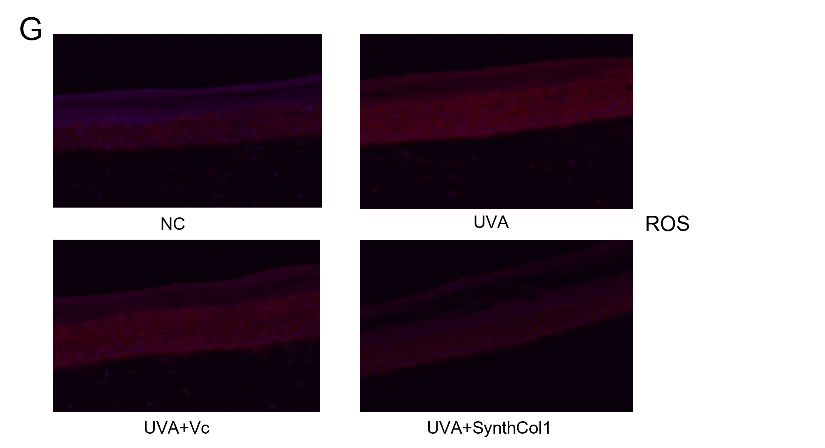
**

Supplementary Figure S2. Topical photoprotective effects of recombinant collagen SynthCol1 in a 3D full-thickness skin model (T-SkinTM).Skin models received topical pre-treatment with: Untreated Control (NC): PBS + visible light exposure. Model Group (UVA): PBS + UVA irradiation (X J/cm²). Positive Control (UVA+Vc): 200 μM vitamin C derivative + UVA irradiation. Test Group (UVA+SynthCol1): SynthCol1 + UVA irradiation. (A-G) Representative immunofluorescence staining of Collagen IV (A), Collagen VII (B), Collagen XVII (C), Loricrin (D), Aquaporin 3 (AQP3) (E), Cytokeratin (F), and reactive oxygen species (ROS) (G).


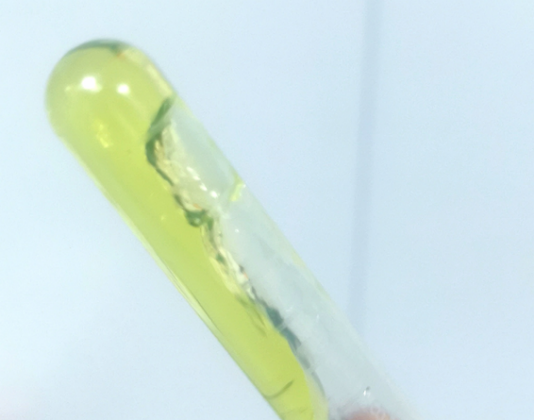


Supplementary Figure S3. Temperature-dependent rheological behavior of recombinant collagen SynthCol1. SynthCol1 solution (~5.0 mg/mL) transitions to a gel-like state at refrigeration temperatures (4°C), demonstrating reversible thermoresponsive properties. The observed gelation suggests potential for temperature-modulated biomaterial applications.
