# Supplementary figures and images for: Expression and Identification of a Novel High-Activity Recombinant Humanized Type I Collagen SynthCol1 in Pichia Pastoris
Source: Research Square preprint supplement (doi:10.21203/rs.3.rs-7985426/v1), 2025-11-21

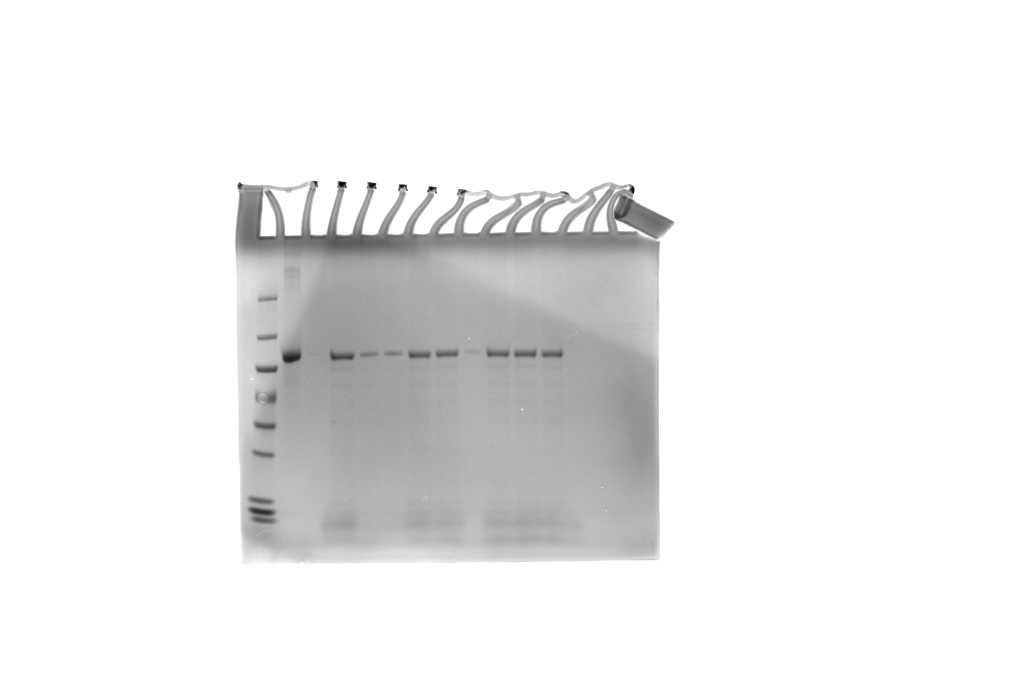


Figure3A-uncropped
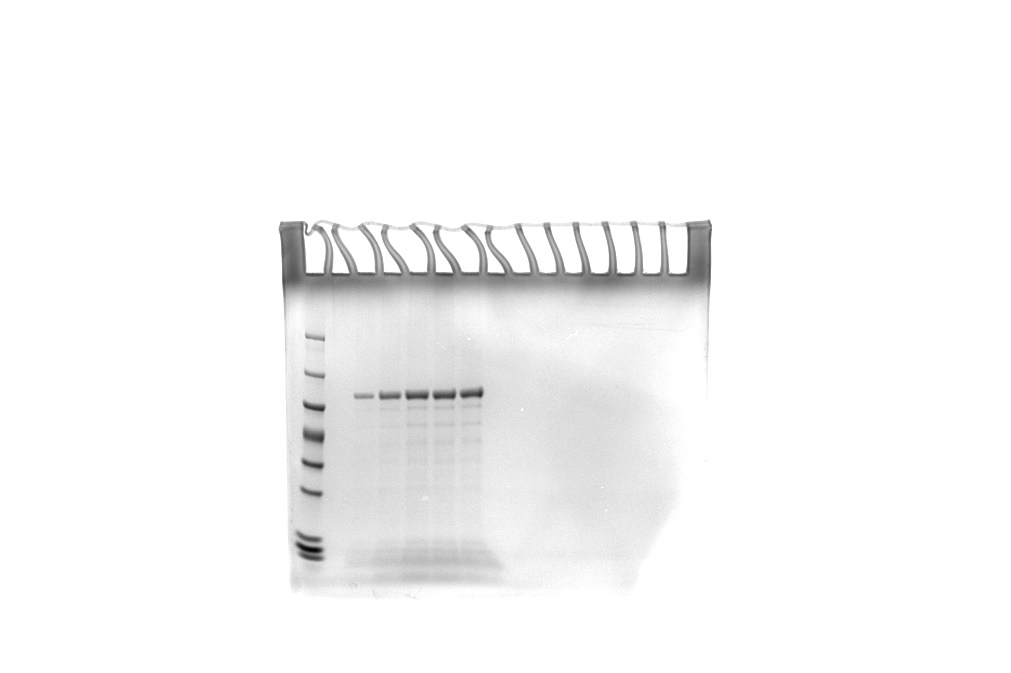


Figure 3B-uncropped


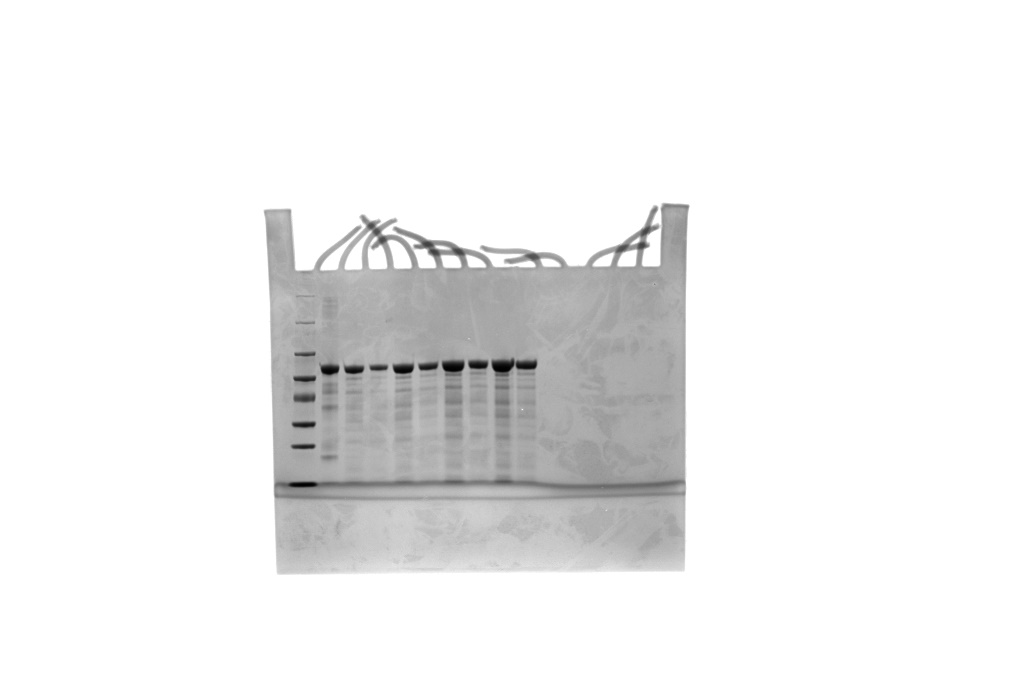


Figure 3E-uncropped


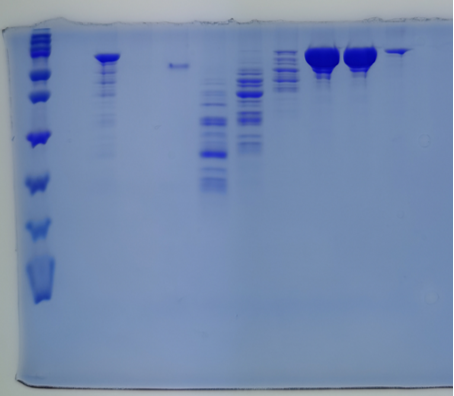


Figure 5A-uncropped

Supplement: Supplementary file 1 [file 48824cc532d8c79d64cef1cd.docx]
